# Supplementary material for: Fluorescence Studies of the Interplay between Metal-Enhanced Fluorescence and Graphene-Induced Quenching
Source: MDPI journal article supplement (doi:10.3390/ma11101916), 2018-10-09
Supplement: s1 [file s1]

# Fluorescence Studies of the Interplay between Metal-Enhanced Fluorescence and Graphene-Induced Quenching

Kamil Wiwatowski, Pawel Podlas, Magdalena Twardowska, Sebastian Maćkowski \*

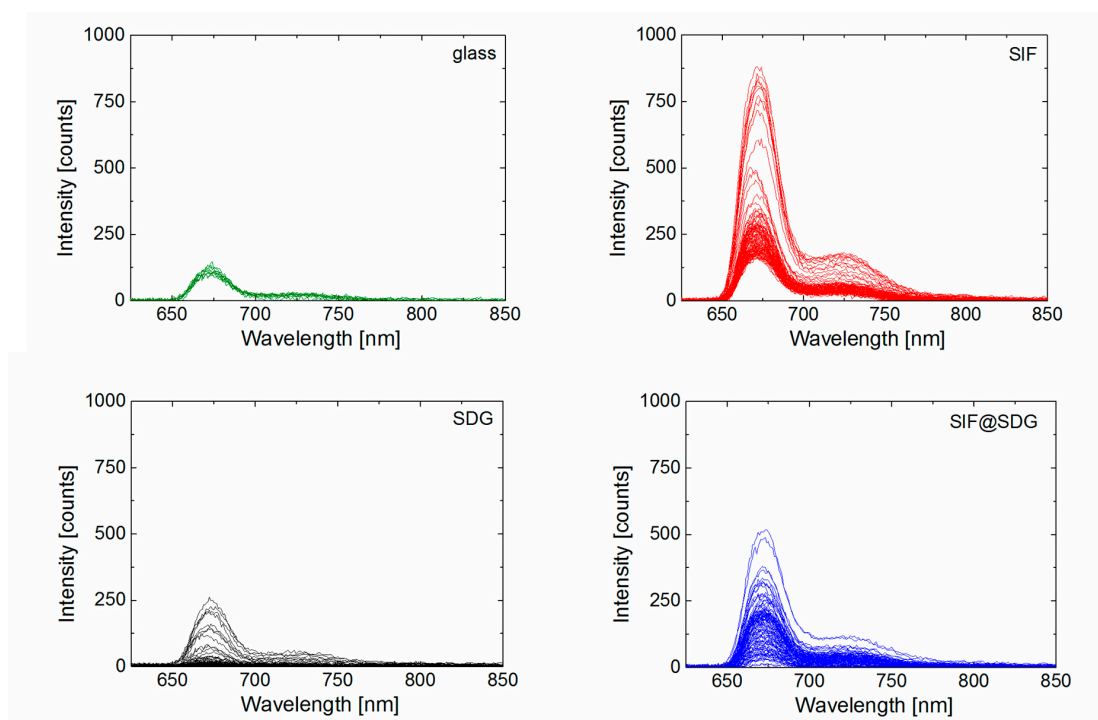

**Figure S1.** Fluorescence spectra measured for PCP complexes deposited on all four substrates.
